# Supplementary material for: De Novo sphingolipid synthesis is essential for Salmonella-induced autophagy and human beta-defensin 2 expression in intestinal epithelial cells
Source: Springer Nature journal article supplement (doi:10.1186/s13099-016-0088-2), 2016-02-18
Supplement: MOESM1 [file 9784842]

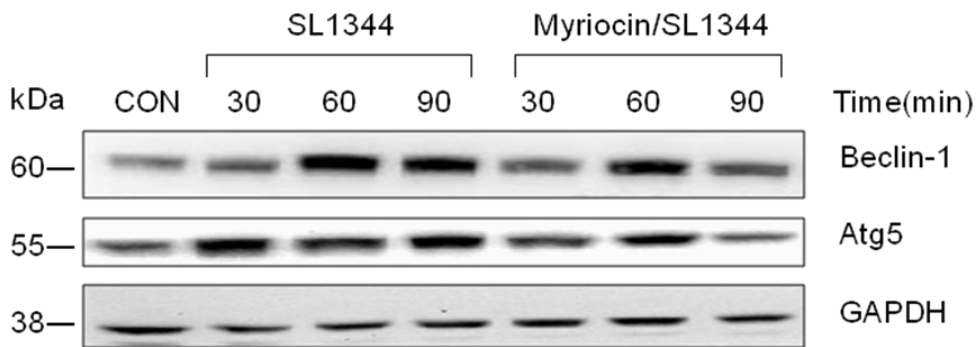

Fig. S1A

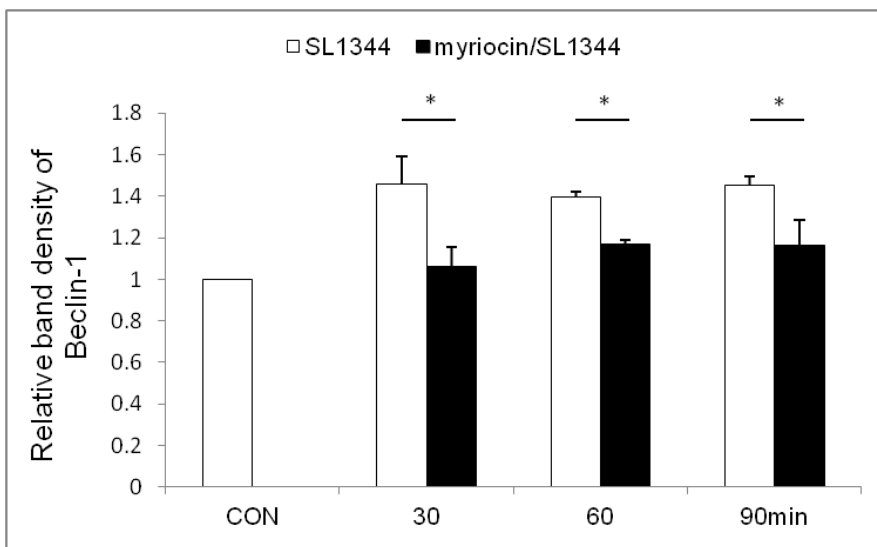

Fig. S1B

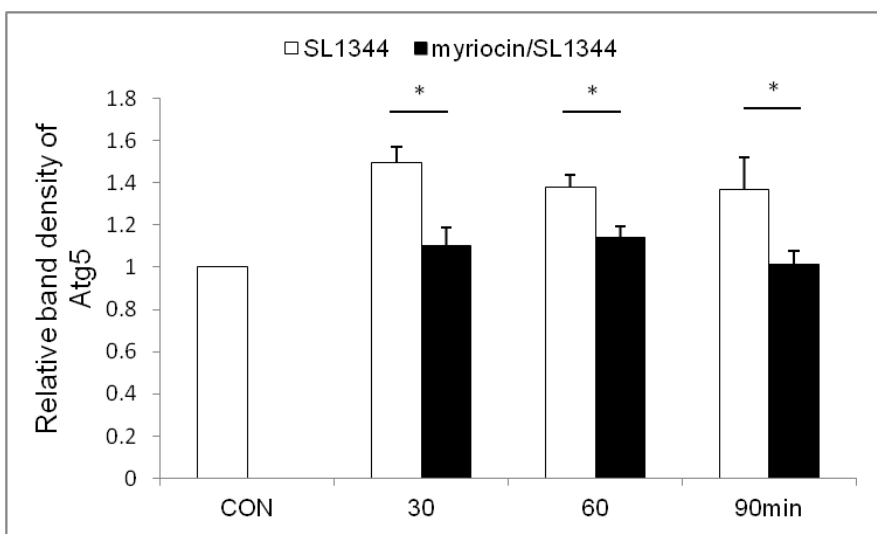

Fig. S1C
